# Supplementary material for: A simple fluorescent probe for Cd2+ in aqueous solution with high selectivity and sensitivity
Source: Royal Society of Chemistry journal article supplement (doi:10.1039/c3dt50216c), 2013-01-01
Supplement: c3dt50216c.pdf [file c3dt50216c.pdf]

Supplementary Material (ESI) for Dalton Transactions  
This journal is (c) The Royal Society of Chemistry 2013

## Supporting Information for

### **A simple fluorescent probe for Cd<sup>2+</sup> in aqueous solution with high selectivity and sensitivity**

Lin Xu,<sup>a,b</sup> Meng-Lan He,<sup>b</sup> Hai-Bo Yang\*<sup>b</sup> and Xuhong Qian\*<sup>a</sup>

<sup>a</sup>Shanghai Key Laboratory of Chemical Biology,  
State Key Laboratory of Bioreactor Engineering, School of Pharmacy,  
East China University of Science and Technology, Shanghai, 200237, China.  
Fax: +86 21 6425 2603; Tel: +86 21 6425 3589; E-mail: xhqian@ecust.edu.cn (X. Qian)

<sup>b</sup>Shanghai Key Laboratory of Green Chemistry and Chemical Processes, Department of Chemistry, East China Normal University, 3663 N. Zhongshan Road, Shanghai, 200062, China. E-mail: hbyang@chem.ecnu.edu.cn (H.-B. Yang)

#### **Contents:**

- 1. The pH-titration of free PBQ and PBQ/Cd<sup>2+</sup>**
- 2. Synthesis of model compounds A-C**
- 3. UV-Vis absorption titration spectra of PBQ with Cd<sup>2+</sup>**
- 4. UV-Vis absorption spectra of PBQ with various metal ions**
- 5. Fluorescence color changes of PBQ with various metal ions**
- 6. UV-Vis absorption spectra of PBQ in the presence of Na<sup>+</sup> and K<sup>+</sup> in aqueous solution and methanol**
- 7. The fluorescent intensity of A, B, and C with various metal ions in aqueous solution**
- 8. HRMS of PBQ**

Supplementary Material (ESI) for Dalton Transactions  
This journal is (c) The Royal Society of Chemistry 2013

## 1. The pH-titration of free PBQ and PBQ/Cd<sup>2+</sup>

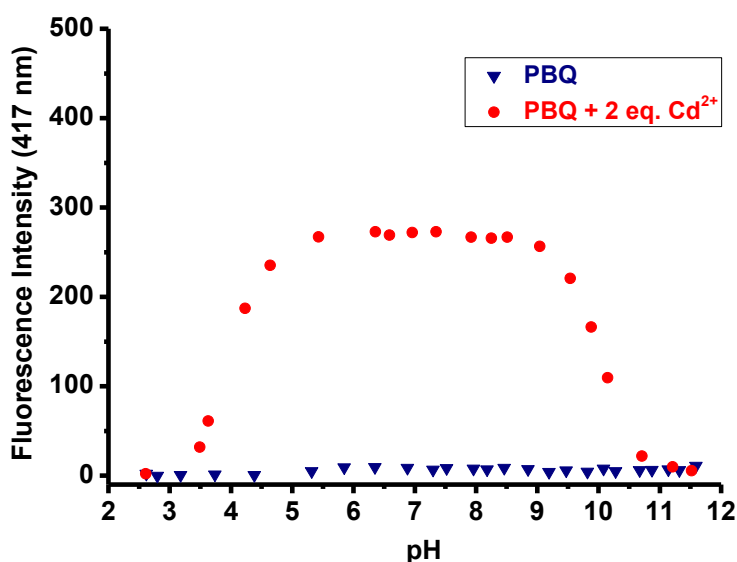

**Fig. S1** The influence of pH on the fluorescence of **PBQ** (10  $\mu$ M) without Cd<sup>2+</sup> (blue) and with 20  $\mu$ M Cd<sup>2+</sup> (red) in water, the pH of the solution was adjusted by adding 10% HClO<sub>4</sub> or 2 M NaOH. Excitation was performed at 302 nm.

## 2. Synthesis of model compounds A-C

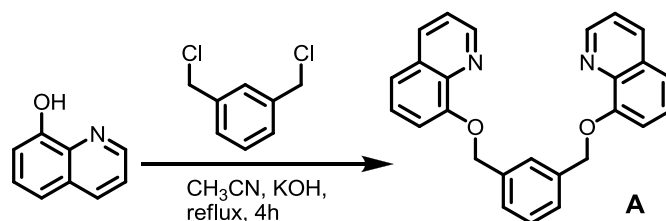

**Scheme S1** Synthesis of **A**

**Compound A:** Potassium hydroxide (224 mg, 4 mmol) was added to a solution of 1,3-bis(chloromethyl)benzene (175 mg, 1 mmol) and 8-hydroxyquinoline (290 mg, 2 mmol) in acetonitrile (10 mL), the mixture was held at reflux for 4h. Then the mixture was filtered, and the solvent was removed in vacuum to give a white solid. The crude product was then chromatographed on silica gel using CH<sub>2</sub>Cl<sub>2</sub>/CH<sub>3</sub>OH (30:1, v/v) as eluant to afford 305 mg (78%) **A** as white solid. <sup>1</sup>H NMR (CDCl<sub>3</sub>, 400 MHz):  $\delta$  5.43 (s, 4H), 6.98 (d,  $J$  = 7.2 Hz, 2H), 7.31-7.37 (m, 5H), 7.40 (q,  $J$  = 4.0 Hz, 2H), 7.46 (d,  $J$  = 7.6 Hz, 2H), 7.64 (s, 1H), 8.10 (d,  $J$  = 8.4 Hz, 2H), 8.94 (dd,  $J_1$  = 2.0 Hz,  $J_2$  = 4.0 Hz, 2H). <sup>13</sup>C NMR (CDCl<sub>3</sub>, 100 MHz):  $\delta$  70.59, 109.93, 119.90, 121.63, 125.70, 126.59, 126.62, 129.11, 129.48, 135.93, 137.41, 140.44, 149.39, 154.21. MS (ES<sup>+</sup>) calcd for C<sub>26</sub>H<sub>20</sub>N<sub>2</sub>O<sub>2</sub>: 392.1525, found: 392.1523.

Supplementary Material (ESI) for Dalton Transactions  
This journal is (c) The Royal Society of Chemistry 2013

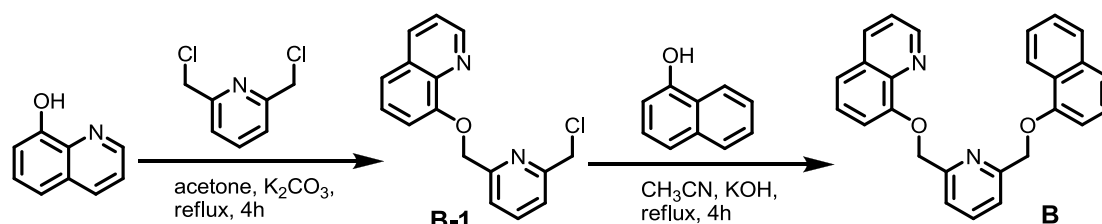

Scheme S2 Synthesis of B

**Compound B-1:** Anhydrous potassium carbonate (300 mg) was added to a solution of 2,6-bis(chloromethyl)pyridine (704 mg, 4 mmol) in acetone (5 mL), and the mixture was held at reflux. An hour later, an acetone solution containing 8-hydroxyquinoline (145 mg, 1 mmol) was added dropwise to the mixture. After the addition, the mixture was held at reflux for another 6h. The mixture was filtered, and the solvent was removed in vacuum to give a white solid. The crude product was then chromatographed on silica gel using ethyl acetate as eluant to afford 182 mg (64%) **B-1** as white solid.  $^1H$  NMR ( $CDCl_3$ , 400 MHz):  $\delta$  4.66 (s, 2H), 5.50 (s, 2H), 6.70 (dd,  $J_1 = 2.4$  Hz,  $J_2 = 6.4$  Hz, 1H), 7.32 (s, 1H), 7.34 (d,  $J = 2.4$  Hz, 2H), 7.39 (dd,  $J_1 = 4.0$  Hz,  $J_2 = 4.2$  Hz, 1H), 7.56 (d,  $J = 7.6$  Hz, 1H), 7.64 (t,  $J_1 = 7.6$  Hz, 1H), 8.08 (dd,  $J_1 = 1.6$  Hz,  $J_2 = 8.0$  Hz, 1H), 8.94 (dd,  $J_1 = 1.6$  Hz,  $J_2 = 4.4$  Hz, 1H).  $^{13}C$  NMR ( $CDCl_3$ , 100 MHz):  $\delta$  46.59, 71.26, 109.82, 120.21, 120.70, 121.69, 126.59, 129.50, 135.92, 137.93, 140.30, 149.42, 153.91, 156.02, 157.08. MS (ES+) calcd for  $C_{16}H_{13}ClN_2O$  ( $[M+H]^+$ ): 285.2, found: 285.6.

**Compound B:** Potassium hydroxide (56 mg, 1 mmol) was added to a solution of **B-1** (142 mg, 0.5 mmol) and 1-naphthol (72 mg, 0.5 mmol) in acetonitrile (15 mL), the mixture was held at reflux for 4h. Then the mixture was filtered, and the solvent was removed in vacuum to give a white solid. The crude product was then chromatographed on silica gel using  $CH_2Cl_2/CH_3OH$  (30:1, v/v) as eluant to afford 333 mg (85%) **B** as white solid.  $^1H$  NMR ( $CDCl_3$ , 400 MHz):  $\delta$  5.44 (s, 2H), 5.58 (s, 2H), 6.90 (d,  $J = 7.6$  Hz, 1H), 7.08 (dd,  $J_1 = 2.4$  Hz,  $J_2 = 6.8$  Hz, 1H), 7.35-7.43 (m, 3H), 7.46 (t,  $J = 4.0$  Hz, 1H), 7.48 (s, 1H), 7.50-7.54 (m, 2H), 7.59 (d,  $J = 7.6$  Hz, 2H), 7.73 (t,  $J = 8.0$  Hz, 1H), 7.81-7.85 (m, 1H), 8.16 (dd,  $J_1 = 1.6$  Hz,  $J_2 = 8.0$  Hz, 1H), 8.41 (q,  $J = 3.2$  Hz, 1H), 9.00 (dd,  $J_1 = 1.6$  Hz,  $J_2 = 4.4$  Hz, 1H).  $^{13}C$  NMR ( $CDCl_3$ , 100 MHz):  $\delta$  70.63, 71.40, 105.39, 109.82, 120.11, 120.21, 120.40, 120.81, 121.78, 122.02, 125.39, 125.63, 125.90, 126.53, 126.67, 127.59, 129.56, 134.58, 136.04, 137.87, 140.33, 149.50, 154.00, 156.67, 156.94. MS (ES+) calcd for  $C_{26}H_{20}N_2O_2$ : 392.1525, found: 392.1527.

Supplementary Material (ESI) for Dalton Transactions  
This journal is (c) The Royal Society of Chemistry 2013

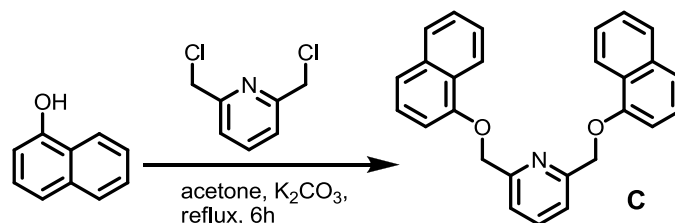

**Scheme S3** Synthesis of **C**

**Compound C:** Anhydrous potassium carbonate (150 mg) was added to a solution of 2,6-bis(chloromethyl)pyridine (176 mg, 1 mmol) and 1-naphthol (288 mg, 2 mmol) in acetone (15 mL), the mixture was held at reflux for 6h. Then the mixture was filtered, and the solvent was removed in vacuum to give a white solid. The crude product was then chromatographed on silica gel using  $CH_2Cl_2/CH_3OH$  (40:1, v/v) as eluant to afford 293 mg (75%) **C** as white solid.  $^1H$  NMR ( $CDCl_3$ , 400 MHz):  $\delta$  5.45 (s, 4H), 6.91 (d,  $J = 7.2$  Hz, 2H), 7.39 (t,  $J = 8.0$  Hz, 2H), 7.49 (d,  $J = 8.4$  Hz, 2H), 7.52-7.56 (m, 4H), 7.64 (d,  $J = 7.6$  Hz, 2H), 7.80 (d,  $J = 7.6$  Hz, 1H), 7.83-7.87 (m, 2H), 8.42-8.46 (m, 2H).  $^{13}C$  NMR ( $CDCl_3$ , 100 MHz):  $\delta$  70.60, 105.39, 120.07, 120.85, 122.05, 125.43, 125.64, 125.93, 126.57, 127.64, 134.60, 137.87, 153.98, 156.94. MS (ES+) calcd for  $C_{27}H_{21}N_2O_2$ : 391.1572, found: 391.1569.

### 3. UV-Vis absorption titration spectra of PBQ with $Cd^{2+}$

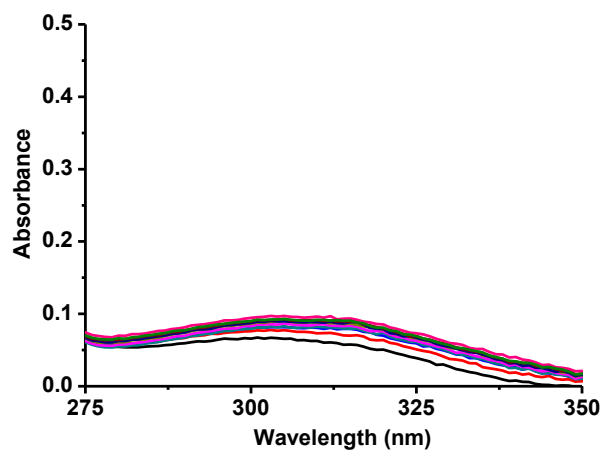

**Fig. S2** UV-Vis absorption spectra of **PBQ** (10  $\mu M$ ) upon addition of  $Cd^{2+}$  (3 ~ 33  $\mu M$ ) in aqueous solution (20 mM Tris-HCl, pH 7.4).

Supplementary Material (ESI) for Dalton Transactions  
This journal is (c) The Royal Society of Chemistry 2013

#### 4. UV-Vis absorption spectra of PBQ with various metal ions

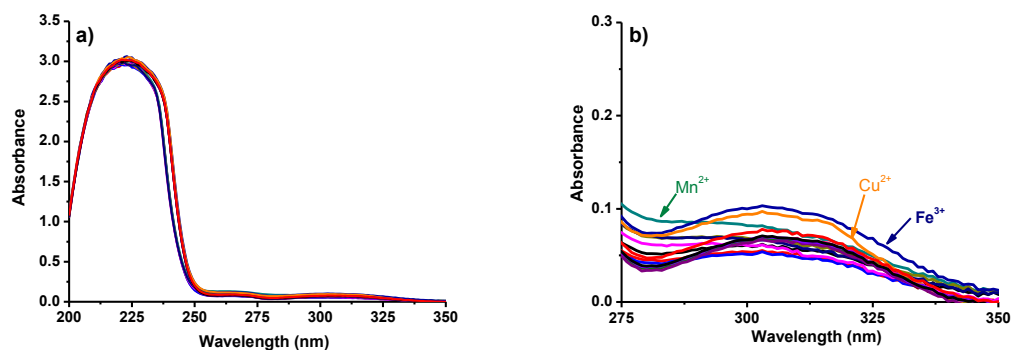

**Fig. S3** UV-Vis absorption spectra of **PBQ** (10  $\mu\text{M}$ ) in the presence of various metal ions (20  $\mu\text{M}$ ) in aqueous solution (20 mM Tris-HCl, pH 7.4).

#### 5. Fluorescence color changes of PBQ with various metal ions

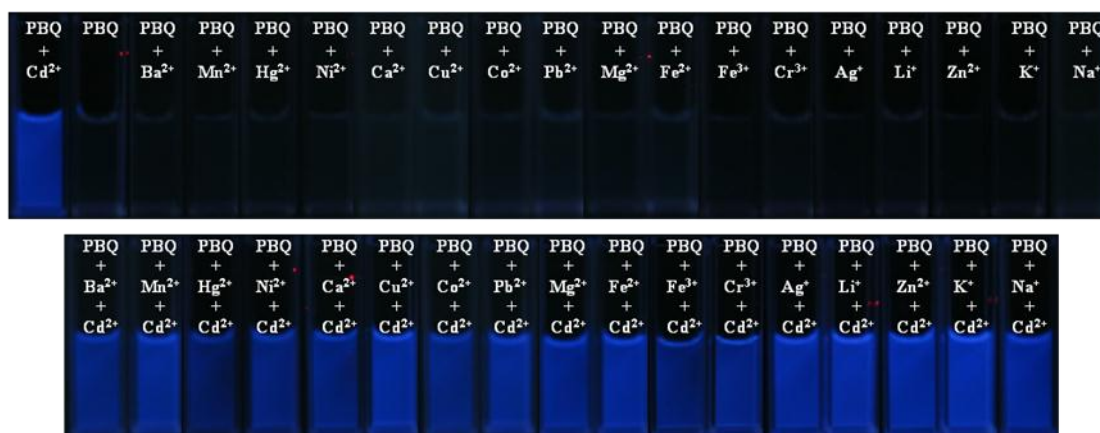

**Fig. S4** The photographs shows the fluorescence color changes (irradiated at 254 nm using UV lamp) of **PBQ** (10  $\mu\text{M}$ ) with 20  $\mu\text{M}$  of various metal ions, and then added 20  $\mu\text{M}$  of  $\text{Cd}^{2+}$  in aqueous solution (20 mM Tris-HCl, pH 7.4).

Supplementary Material (ESI) for Dalton Transactions  
This journal is (c) The Royal Society of Chemistry 2013

## 6. UV-Vis absorption spectra of PBQ in the presence of Na<sup>+</sup> and K<sup>+</sup> in aqueous solution and methanol

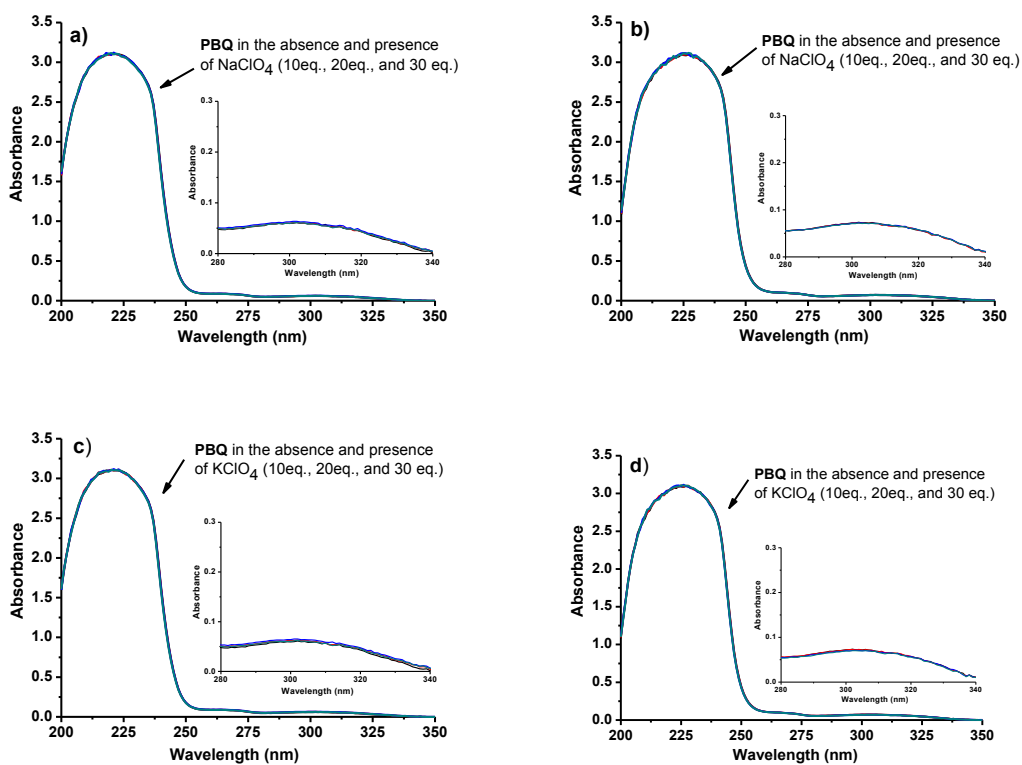

**Fig. S5** UV-Vis absorption spectra of **PBQ** (10 μM) in the presence of Na<sup>+</sup> (100 μM, 200 μM, and 300 μM) in aqueous solution (20 mM Tris-HCl, pH 7.4) (a) and CH<sub>3</sub>OH (b); UV-Vis absorption spectra of **PBQ** (10 μM) in the presence of K<sup>+</sup> (100 μM, 200 μM, and 300 μM) in aqueous solution (20 mM Tris-HCl, pH 7.4) (c) and CH<sub>3</sub>OH (d).

Supplementary Material (ESI) for Dalton Transactions  
This journal is (c) The Royal Society of Chemistry 2013

## 7. The fluorescent intensity of A , B, and C with various metal ions in aqueous solution

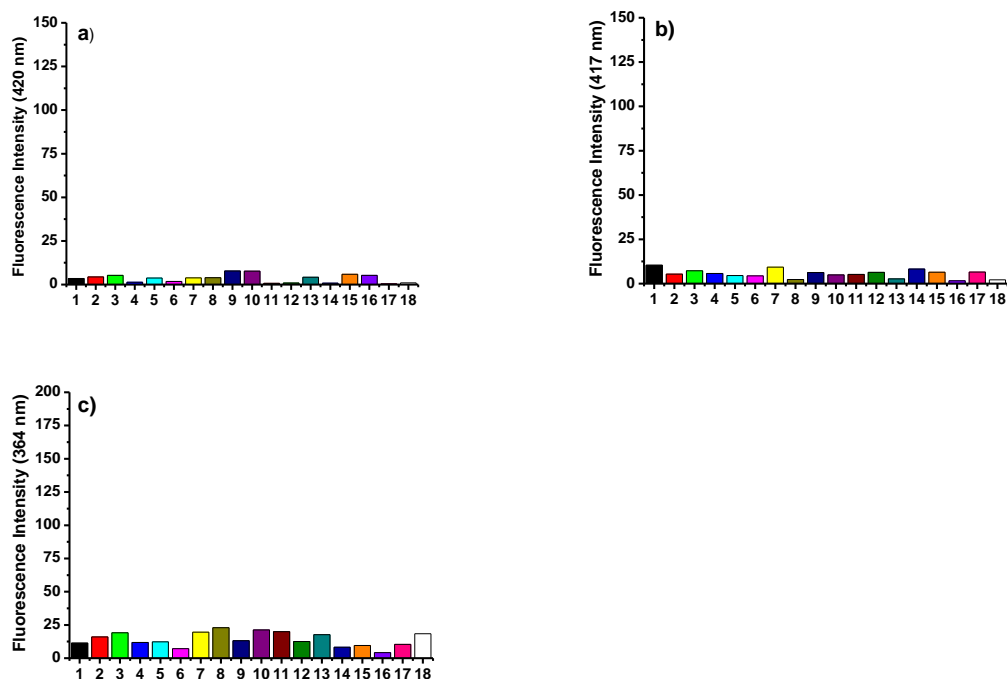

**Fig. S6** The fluorescent intensity of **A** (a), **B** (b), and **C** (c) (**A**, **B**, and **C** were 10  $\mu$ M) with 2 equiv. of various metal ions in aqueous solution (20 mM Tris-HCl, pH 7.4). 1, **A** (a), **B** (b), and **C** (c); 2, Mn<sup>2+</sup>; 3, Hg<sup>2+</sup>; 4, Ni<sup>2+</sup>; 5, Ca<sup>2+</sup>; 6, Cu<sup>2+</sup>; 7, Co<sup>2+</sup>; 8, Pb<sup>2+</sup>; 9, Mg<sup>2+</sup>; 10, Fe<sup>2+</sup>; 11, Fe<sup>3+</sup>; 12, Cr<sup>3+</sup>; 13, Ag<sup>+</sup>; 14, Li<sup>+</sup>; 15, Zn<sup>2+</sup>; 16, K<sup>+</sup>; 17, Na<sup>+</sup>; 18, Ba<sup>2+</sup>.  $\lambda_{\text{ex}} = 302$  nm.

## 8. HRMS of PBQ

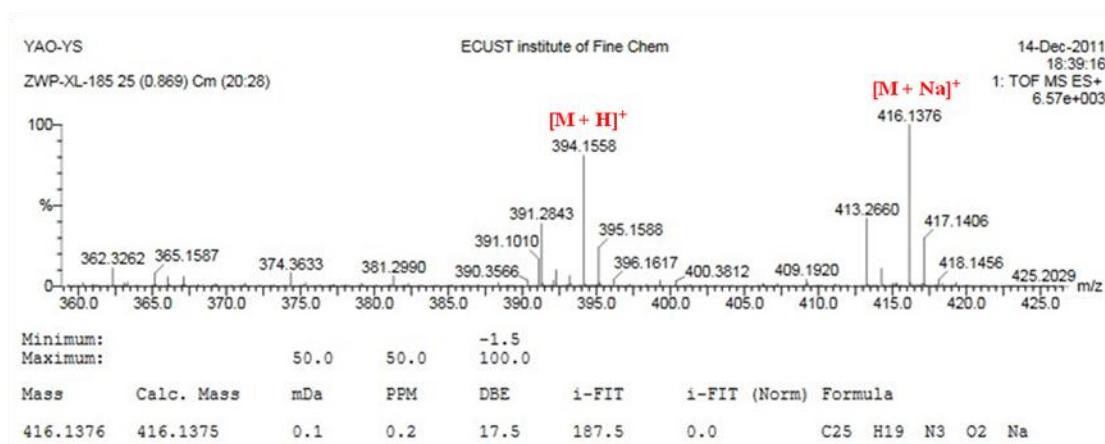

**Fig. S7** HRMS of PBQ.
